# Supplementary material for: Utilization of ferulic acid in Aspergillus niger requires the transcription factor FarA and a newly identified Far-like protein (FarD) that lacks the canonical Zn(II)2Cys6 domain
Source: Front Fungal Biol. 2022 Nov 8;3:978845. doi: 10.3389/ffunb.2022.978845 (PMC10512302; doi:10.3389/ffunb.2022.978845)
Supplement: Supplementary file 6 [file Table_2.xls]

## Sheet: Blad1
Supplementary Table 2: List of transcription factor knock mutants in A. niger
TF deletion number	Systematic name	CBS Number	NRRL3_number	Description	Gene name
1	MA343.1	An06g02430	NRRL3_11822	fungal-specific transcription factor
2	MA344.3	An04g09790	NRRL3_07461	fungal-specific transcription factor
3	MA345.1	An03g05340	NRRL3_08394	fungal-specific transcription factor
4	MA300.1	An11g04050	NRRL3_09809	fungal-specific transcription factor
5	MA346.2	An13g03030	NRRL3_01335	fungal-specific transcription factor
6	MA347.1	An12g05220	NRRL3_03320	fungal-specific transcription factor
7	MA348.1	An18g05600	NRRL3_10607	fungal-specific transcription factor
8	MA349.2	An11g03780	NRRL3_09840	fungal-specific transcription factor
9	MA350.1	An04g06000	NRRL3_07764	fungal-specific transcription factor
10	MA351.1	An01g11260	NRRL3_02550	fungal-specific transcription factor
11	MA352.1	An08g03650	NRRL3_11015	hypothetical protein
12	MA353.1	An01g01330	NRRL3_01738	fungal-specific transcription factor
13	MA354.1	An14g04000	NRRL3_00937	fungal-specific transcription factor
14	MA355.1	An13g00910	NRRL3_01496	fungal-specific transcription factor	RhaR;rhamnose regulator
15	MA356.2	An01g11310	NRRL3_02554	fungal-specific transcription factor
16	MA357.1	An09g01070	NRRL3_00079	luciferase-like monooxygenase
17	MA358.1	An02g01140	NRRL3_06163	fungal-specific transcription factor
18	MA359.1	An14g01510	NRRL3_00719	zinc finger protein, C2H2-like
19	MA360.1	An01g14540	NRRL3_02823	fungal-specific transcription factor
20	MA361.1	An09g01870	NRRL3_00148	fungal-specific transcription factor
21	MA301.2	An09g01200	NRRL3_00093	fungal-specific transcription factor
22	MA362.2	An17g00650	NRRL3_06448	fungal-specific transcription factor
23	MA363.2	An14g01360	NRRL3_00704	fungal-specific transcription factor
24	MA364.1	An04g08040	NRRL3_07608	fungal-specific transcription factor
25	MA365.1	An09g00800	NRRL3_00072	fungal-specific transcription factor
26	MA366.1	An11g04160	NRRL3_09799	fungal-specific transcription factor
27	MA367.1	An11g03890	NRRL3_09831	fungal-specific transcription factor
28	MA368.1	An01g10280	NRRL3_02473	fungal-specific transcription factor
29	MA369.1	An16g01640	NRRL3_07290	fungal-specific transcription factor	GalX; galactose utilization
30	MA370.1	An11g03690	NRRL3_09846	fungal-specific transcription factor
31	MA371.1	An12g01060	NRRL3_09117	fungal-specific transcription factor
32	MA280.1	An01g06900	NRRL3_02186	fungal-specific transcription factor	fumR: fumonisin biosynthesis
33	MA372.1	An09g03050	NRRL3_00245	tetratricopeptide repeat protein
34	MA373.1	An11g06290	NRRL3_09625	fungal-specific transcription factor
35	MA374.1	An07g01280	NRRL3_04327	fungal-specific transcription factor
36	MA375.1	An10g01020	NRRL3_06372	fungal-specific transcription factor
37	MA376.1	An08g09370	NRRL3_11472	fungal-specific transcription factor
38	MA377.1	An07g01380	NRRL3_04334	fungal-specific transcription factor
39	MA378.1	An11g07670	NRRL3_09528	hypothetical protein
40	MA379.1	An03g05980	NRRL3_08344	fungal-specific transcription factor
41	MA380.1	An06g00330	NRRL3_11734	fungal-specific transcription factor
42	MA381.1	An16g00750	NRRL3_07368	fungal-specific transcription factor
43	MA382.1	An02g06180	NRRL3_05772	fungal-specific transcription factor
44	MA383.1	An07g06050	NRRL3_04695	bZIP transcription factor	Yap3-ortholog; stress response
45	MA384.1	An08g01460	NRRL3_10843	fungal-specific transcription factor
46	MA385.1	An03g01760	NRRL3_08652	fungal-specific transcription factor
47	MA386.1	An08g10210	NRRL3_11546	fungal-specific transcription factor
48	MA387.1	An15g04790	NRRL3_03951	fungal-specific transcription factor
49	MA388.1	An16g04000	NRRL3_06996	hypothetical protein
50	MA389.1	An04g02200	NRRL3_08063	aflatoxin biosynthesis regulatory protein
51	MA390.1	An11g07610	NRRL3_09535	fungal-specific transcription factor
52	MA283.1	An16g08800	NRRL3_06646	transcriptional regulator
53	MA391.1	An02g10850	no ortholog	fungal-specific transcription factor
54	MA392.1	An01g05890	NRRL3_02106	hypothetical protein
55	MA393.1	An16g07890	NRRL3_06720	fungal-specific transcription factor
56	MA394.1	An02g08210	NRRL3_05610	hypothetical protein
57	MA395.1	An16g04530	NRRL3_06950	fungal-specific transcription factor
58	MA396.1	An08g07930	NRRL3_11354	fungal-specific transcription factor
59	MA397.1	An05g02020	NRRL3_08840	fungal-specific transcription factor
60	MA398.1	An16g01230	NRRL3_07332	zinc finger protein, C2H2-type	BrlA-like
61	MA399.1	An14g07360	no ortholog	fungal-specific transcription factor
62	MA400.1	An15g04220	NRRL3_03898	fungal-specific transcription factor
63	MA401.1	An16g01410	NRRL3_07313	fungal-specific transcription factor
64	MA402.1	An16g01390	NRRL3_07315	fungal-specific transcription factor
65	MA403.1	An08g01860	NRRL3_10879	zinc finger protein, C2H2-type
66	MA404.1	An15g04410	NRRL3_03915	fungal-specific transcription factor
67	MA405.1	An08g04000	NRRL3_11051	bHLH transcription factor
68	MA406.1	An05g00020	NRRL3_03544	fungal-specific transcription factor
69	MA407.1	An02g02240	NRRL3_06076	zinc finger protein, GATA-type	AreB-ortholog; nitrogen regulation
70	MA408.1	An01g09580	NRRL3_02418	fungal-specific transcription factor
71	MA409.1	An16g06780	NRRL3_06793	fungal-specific transcription factor
72	MA410.1	An12g02210	NRRL3_09020	fungal-specific transcription factor
73	MA411.1	An12g05200	NRRL3_03322	fungal-specific transcription factor
74	MA412.1	An14g06110	NRRL3_01096	fungal-specific transcription factor
75	MA413.1	An04g06240	NRRL3_07741	fungal-specific transcription factor
76	MA414.1	An08g00710	NRRL3_10770	fungal-specific transcription factor
77	MA415.1	An01g13890	NRRL3_02771	fungal-specific transcription factor	UaY-ortholog;specific regulator of the purine utilization pathway in Aspergillus nidulans
78	MA416.1	An01g11860	NRRL3_02604	fungal-specific transcription factor
79	MA417.1	An02g12210	NRRL3_05280	MADS-box transcription factor	RlmA
80	MA418.1	An06g02450	NRRL3_11823	fungal-specific transcription factor
81	MA419.1	An12g03200	NRRL3_08936	NmrA-like protein
82	MA420.1	An05g00720	NRRL3_03490	fungal-specific transcription factor
83	MA271.1	An12g01870	NRRL3_09050	fungal-specific transcription factor	ManR; mannan regulator
84	MA421.1	An15g02450	NRRL3_03781	fungal-specific transcription factor
85	MA422.1	An08g10880	NRRL3_11765	fungal-specific transcription factor
86	MA423.1	An11g03220	NRRL3_09883	fungal-specific transcription factor
87	MA424.1	An12g09580	NRRL3_03001	fungal-specific transcription factor
88	MA425.1	An08g11000	NRRL3_11758	fungal-specific transcription factor
89	MA426.1	An06g02570	NRRL3_11835	fungal-specific transcription factor
90	MA427.2	An08g01920	NRRL3_10883	fungal-specific transcription factor	AlfR orthologue
91	MA428.1	An09g05060	NRRL3_00406	fungal-specific transcription factor
92	MA302.1	An14g05790	NRRL3_01068	fungal-specific transcription factor
93	MA341.1	An03g00160	NRRL3_08770	fungal-specific transcription factor
94	MA429.1	An18g02280	NRRL3_10342	fungal-specific transcription factor
95	MA430.1	An03g03350	NRRL3_08550	fungal-specific transcription factor
96	MA431.2	An01g15070	NRRL3_02871	fungal-specific transcription factor
97	MA432.2	An13g02100	NRRL3_01397	fungal-specific transcription factor
98	MA433.1	An11g01060	NRRL3_10055	fungal-specific transcription factor
99	MA434.1	An11g02150	NRRL3_09972	fungal-specific transcription factor
100	MA435.1	An06g01180	NRRL3_11653	fungal-specific transcription factor
101	MA436.1	An15g07330	NRRL3_04165	fungal-specific transcription factor
102	MA437.1	An07g07640	NRRL3_04819	fungal-specific transcription factor
103	MA438.1	An11g05380	NRRL3_09710	fungal-specific transcription factor
104	MA439.1	An04g04490	NRRL3_07873	fungal-specific transcription factor
105	MA440.7	An15g00300	NRRL3_03593	fungal-specific transcription factor	inuR; regulator of inulin utilization
106	MA441.2	An11g10820	NRRL3_09254	zinc finger protein, GATA-type	LreA-orthilog; homolog of light recepetor regulator wc-1
107	MA442.1	An02g13290	NRRL3_05196	fungal-specific transcription factor
108	MA443.1	An06g00830	NRRL3_11687	fungal-specific transcription factor
109	MA444.1	An04g07190	NRRL3_07673	fungal-specific transcription factor
110	MA445.2	An11g00810	NRRL3_10074	fungal-specific transcription factor
111	MA446.2	An15g05080	NRRL3_03976	fungal-specific transcription factor
112	MA447.1	An18g02340	NRRL3_10345	fungal-specific transcription factor
113	MA448.1	An13g04070	NRRL3_01255	uncharacterized protein
114	MA303.1	An16g07020	no ortholog	fungal-specific transcription factor
115	MA449.1	An16g00430	NRRL3_07389	fungal-specific transcription factor
116	MA450.1	An16g00430	NRRL3_07389	fungal-specific transcription factor
117	MA451.1	An11g10050	NRRL3_09317	fungal-specific transcription factor
118	MA452.1	An02g14490	NRRL3_05092	transcription activator of gluconeogenesis
119	MA453.1	An16g07460	NRRL3_06749	fungal-specific transcription factor
120	MA454.1	An01g13080	NRRL3_02702	fungal-specific transcription factor
121	MA455.1	An08g02110	NRRL3_10899	zinc finger protein, C2H2-type
122	MA456.2	An17g02270	NRRL3_06585	transcription factor, forkhead
123	MA457.1	An16g02920	NRRL3_07079	fungal-specific transcription factor
124	MA458.1	An12g05830	NRRL3_03271	fungal-specific transcription factor
125	MA459.1	An01g13790	NRRL3_02764	homeobox transcription factor
126	MA460.1	An15g05840	NRRL3_04037	fungal-specific transcription factor
127	MA461.2	An01g09530	NRRL3_02413	fungal-specific transcription factor
128	MA304.3	An12g08510	NRRL3_03076	fungal-specific transcription factor
129	MA462.1	An04g07240	NRRL3_07668	fungal-specific transcription factor
130	MA463.1	An15g05810	NRRL3_04034	xylanolytic transcriptional activator XlnR	XlnR; involved in Xylose utilization
131	MA464.1	An02g03420	NRRL3_05981	fungal-specific transcription factor
132	MA465.1	An13g00690	NRRL3_01515	fungal-specific transcription factor
133	MA466.1	An02g12830	NRRL3_05233	fungal-specific transcription factor
134	MA467.1	An04g08600	NRRL3_07564	fungal-specific transcription factor	AraR; regulator of arabinose utilization
135	MA468.1	An13g03870	NRRL3_01276	fungal-specific transcription factor
136	MA469.2	An08g03870	NRRL3_11038	fungal-specific transcription factor	QutA; quinate breakdown
137	MA470.1	An09g00500	NRRL3_00033	fungal-specific transcription factor
138	MA471.2	An08g10980	NRRL3_11760	fungal-specific transcription factor
139	MA472.1	An03g06510	NRRL3_08304	fungal-specific transcription factor
140	MA473.1	An14g07040	NRRL3_01179	fungal-specific transcription factor
141	MA474.1	An05g01340	NRRL3_08914	fungal-specific transcription factor
142	MA475.1	An11g05310	NRRL3_09715	fungal-specific transcription factor
143	MA476.1	An15g02960	NRRL3_03818	hypothetical protein
144	MA477.1	An08g04700	NRRL3_11111	fungal-specific transcription factor
145	MA478.1	An14g02410	NRRL3_00795	fungal-specific transcription factor
146	MA479.2	An18g02250	NRRL3_10340	fungal-specific transcription factor
147	MA480.1	An02g07170	NRRL3_05697	fungal-specific transcription factor
148	MA481.2	An11g06180	NRRL3_09635	fungal-specific transcription factor	PrnA; regulator of proline utilization
149	MA482.1	An01g13640	NRRL3_02749	fungal-specific transcription factor
150	MA483.2	An03g04760	NRRL3_08447	RmlC-like cupin domain-containing protein
151	MA484.5	An07g07370	NRRL3_04794	myb domain-containing protein
152	MA485.1	An11g02870	NRRL3_09909	fungal-specific transcription factor
153	MA486.2	An12g00860	NRRL3_09135	high mobility group protein
154	MA487.1	An18g02330	NRRL3_10345	fungal-specific transcription factor	nirA; regullate nitrate induction
155	MA488.1	An12g07690	NRRL3_03129	fungal-specific transcription factor
156	MA489.1	An04g01500	NRRL3_08133	zinc finger protein, C2H2-type
157	MA490.1	An01g04990	NRRL3_02032	zinc finger protein, C2H2-like
158	MA491.2	An11g11070	NRRL3_09236	zinc finger protein, CCCH-type
159	MA492.1	An03g02940	NRRL3_08566	fungal-specific transcription factor
160	MA493.2	An09g06280	NRRL3_00511	bZIP transcription factor
161	MA494.1	An01g13950	NRRL3_02777	bHLH transcription factor
162	MA495.1	An11g10460	NRRL3_09283	fungal-specific transcription factor
163	MA496.2	An06g01060	NRRL3_11663	fungal-specific transcription factor
164	MA497.1	An18g05520	NRRL3_10601	fungal-specific transcription factor
165	MA498.2	An13g01370	NRRL3_01452	fungal-specific transcription factor
166	MA499.1	An09g05200	NRRL3_00417	fungal-specific transcription factor
167	MA500.2	An01g02150	NRRL3_01818	fungal-specific transcription factor	ArcA; involved in Arginine biosyntheses
168	MA501.1	An03g02560	NRRL3_08598	fungal-specific transcription factor
169	MA502.3	An16g01110	NRRL3_07341	fungal-specific transcription factor
170	MA503.2	An01g13410	NRRL3_02729	fungal-specific transcription factor
171	MA504.2	An18g06540	NRRL3_10688	fungal-specific transcription factor
172	MA505.1	An11g02690	NRRL3_09922	fungal-specific transcription factor
173	MA305.1	An01g12320	NRRL3_02645	hypothetical protein
174	MA506.2	An02g06700	NRRL3_05735	bZIP transcription factor	MeaB-ortholog
175	MA507.1	An11g09150	NRRL3_09413	fungal-specific transcription factor
176	MA508.1	An16g02700	NRRL3_07095	fungal-specific transcription factor
177	MA509.1	An07g01620	NRRL3_04352	fungal-specific transcription factor
178	MA510.1	An01g07450	no ortholog	fungal-specific transcription factor
179	MA511.1	An02g08620	NRRL3_05558	fungal-specific transcription factor
180	MA512.2	An15g06540	NRRL3_04100	fungal-specific transcription factor
181	MA513.1	An04g03980	NRRL3_07909	zinc finger protein, C2H2-type
182	MA514.1	An03g06810	NRRL3_08275	fungal-specific transcription factor
183	MA515.1	An07g01690	NRRL3_04357	fungal-specific transcription factor
184	MA516.1	An13g01280	NRRL3_01460	fungal-specific transcription factor
185	MA517.2	An15g03650	NRRL3_03860	CCAAT-binding transcription factor	HapB-ortholog
186	MA518.1	An04g07400	NRRL3_07655	fungal-specific transcription factor
187	MA519.1	An04g00500	NRRL3_08220	fungal-specific transcription factor
188	MA520.1	An07g02880	NRRL3_04449	fungal-specific transcription factor
189	MA306.1	An18g05920	NRRL3_10641	zinc finger protein, C2H2-type	CrzA ortholog: Ca signalling
190	MA307.1	An08g01380	NRRL3_10837	bHLH transcription factor
191	MA521.1	An06g00640	NRRL3_11708	fungal-specific transcription factor
192	MA522.1	An08g07490	NRRL3_11324	fungal-specific transcription factor
193	MA523.1	An01g08600	NRRL3_02332	Smr domain-containing protein
194	MA524.1	An15g03710	NRRL3_03863	hypothetical protein	FlbB ortholog
195	MA525.2	An04g04080	NRRL3_07904	fungal-specific transcription factor
196	MA308.1	An01g02370	NRRL3_01841	zinc finger protein, GATA-type	sreA-ortholog; repressor of iron uptake
197	MA526.1	An08g06380	NRRL3_11232	uncharacterized protein
198	MA527.2	An17g01580	NRRL3_06522	transcription factor SteA, sexual reproduction	SteA ortholog; required for sexual reproduction
199	MA281.1	An08g06850	NRRL3_11274	zinc finger protein, C2H2-type
200	MA528.1	An01g08050	NRRL3_02286	fungal-specific transcription factor
201	MA529.2	An15g07220	NRRL3_04156	fungal-specific transcription factor
202	MA530.1	An17g01300	NRRL3_06499	fungal-specific transcription factor	AmdA ortholog; involved in AmdS expression A. nidulans
203	MA310.2	An02g11480	NRRL3_05332	fungal-specific transcription factor	tamA; nitrogen regulation co-activator of areA
204	MA309.2	An03g06760	NRRL3_08279	fungal-specific transcription factor
205	MA282.2	An14g06250	NRRL3_01109	bZIP transcription factor
206	MA531.1	An16g03290	NRRL3_07054	fungal-specific transcription factor
207	MA311.1	An07g07930	NRRL3_04843	fungal-specific transcription factor
208	MA532.4	An12g09190	NRRL3_03032	zinc finger protein, C2H2-type
209	MA533.1	An07g07050	NRRL3_04769	fungal-specific transcription factor
210	MA534.2	An02g07070	NRRL3_05704	bZIP transcription factor	Atf1-ortholog; stress response
211	MA535.1	An04g00480	NRRL3_08222	bZIP transcription factor
212	MA536.3	An04g08620	NRRL3_07562	fungal-specific transcription factor
213	MA537.3	An14g00920	NRRL3_00665	fungal-specific transcription factor
214	MA538.1	An11g10870	NRRL3_09252	fungal-specific transcription factor
215	MA539.2	An18g04060	NRRL3_10493	fungal-specific transcription factor
216	MA540.1	An12g00470	NRRL3_09174	zinc finger protein, CCHC-type
217	MA541.1	An16g08980	NRRL3_06630	fungal-specific transcription factor
218	MA342.2	An02g03830	NRRL3_05946	zinc finger protein, C2H2-type	CreA
219	MA542.1	An02g09780	NRRL3_05469	fungal-specific transcription factor
220	MA543.2	An15g06600	NRRL3_04105	fungal-specific transcription factor
221	MA544.1	An13g00370	NRRL3_01544	zinc finger protein, C2H2-type	NsdC-ortholog; positive regulator of sexual development in A.nidulans
222	MA545.1	An01g10770	NRRL3_02510	bZIP transcription factor
223	MA546.1	An04g09290	NRRL3_07502	fungal specific transcription factor	AmdX-ortholog; regulation of AmdS in A. nidulans
224	MA547.1	An04g06690	NRRL3_07711	homeobox-like protein	RfeB-ortolog; unknown function
225	MA312.3	An04g05060	NRRL3_07835	zinc finger protein, C2H2-type
226	MA548.1	An02g11720	NRRL3_05313	alpha-mannosidase
227	MA549.1	An11g09430	NRRL3_09381	hypothetical protein
228	MA550.1	An01g07140	NRRL3_02208	fungal-specific transcription factor
229	MA551.1	An04g06910	NRRL3_07701	transcription regulator of maltose utilization AmyR	AmyR; regulator of starch utilization
230	MA552.1	An14g02540	NRRL3_00804	bHLH transcription factor
231	MA553.1	An04g04510	NRRL3_07871	bZIP transcription factor	JlbA-otholog; amino acid starvation responsive TF in A. nidulans
232	MA554.1	An12g02880	NRRL3_08965	fungal-specific transcription factor
233	MA555.2	An16g02040	NRRL3_07253	zinc finger protein, C2H2-type
234	MA556.1	An03g05170	NRRL3_08408	sterol regulatory element–binding protein
235	MA557.1	An04g06940	NRRL3_07698	transcriptional activator of proteases PrtT	PrtT; regullator of protease expression
236	MA558.1	An01g10980	NRRL3_02529	fungal-specific transcription factor
237	MA559.1	An08g06580	NRRL3_11250	fungal-specific transcription factor	FacB ; required for acetate induction
238	MA560.1	An11g07350	NRRL3_09545	fungal-specific transcription factor
239	MA561.1	An13g01290	NRRL3_01459	fungal-specific transcription factor
